# Supplementary material for: Mass Spectrometry Imaging Differentiates Chromophobe Renal Cell Carcinoma and Renal Oncocytoma with High Accuracy
Source: PubMed Central journal article supplement (PMC7477404; doi:10.7150/jca.47698), 2020-08-21
Supplement: jcav11p6081s1.pdf [file jcav11p6081s1.pdf]

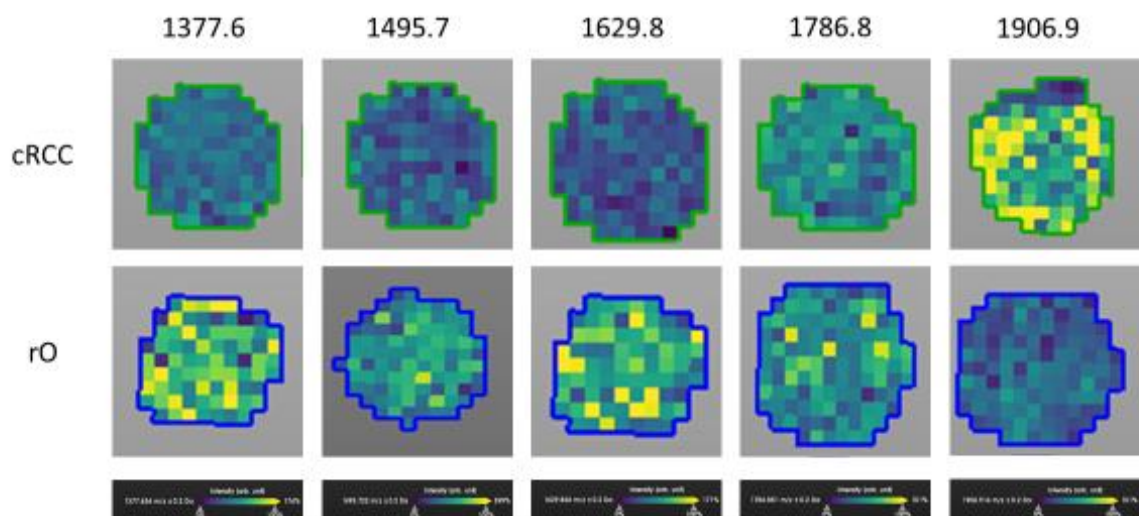

**Suppl. Figure 1: Examples of Mass spectrometry Images of selected m/z peaks in cRCC and rO.**

The intensity and distribution of the six selected m/z peaks in cRCC (green outline) and rO (blue outline) are displayed. One representative core of the tissue microarray is highlighted.

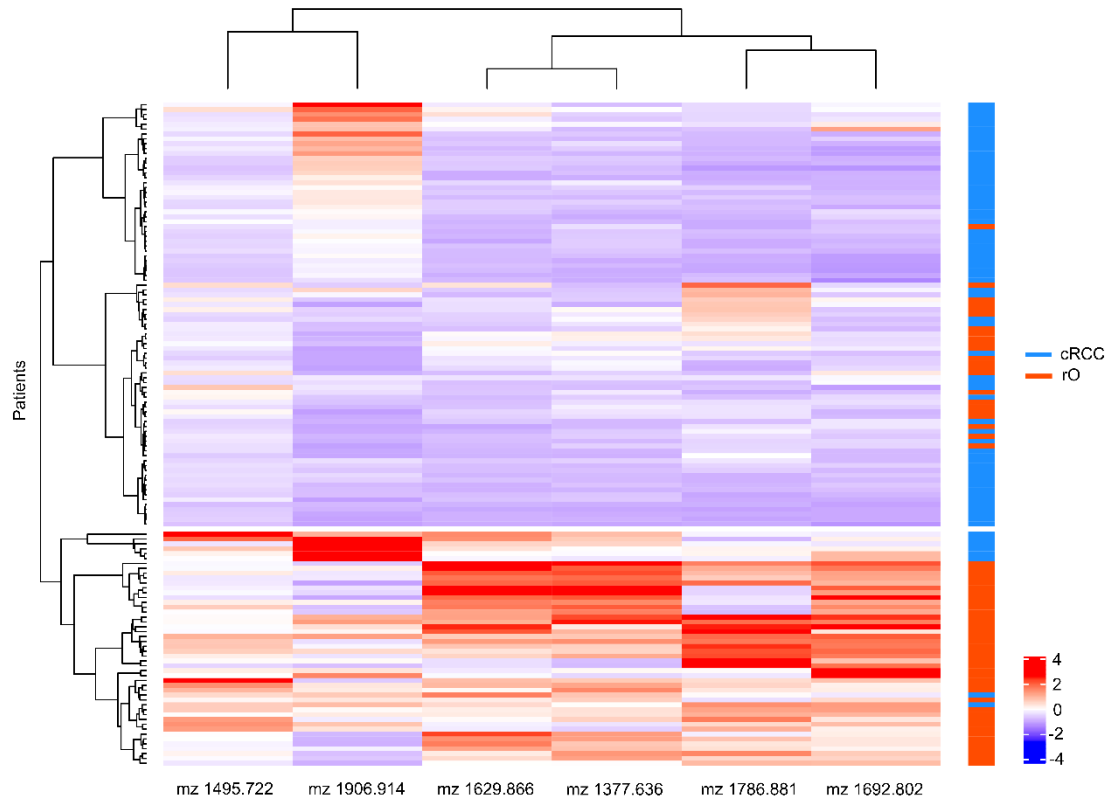

**Suppl. Figure 2: Hierarchical unsupervised cluster analysis of selected m/z peaks in cRCC and rO.**

Hierarchical unsupervised cluster analysis revealed two main clusters. The upper cluster is enriched with cRCC (blue), while the lower cluster is enriched with rO (red). All but m/z peak 1906.9 showed a higher intensity in rO compared to cRCC.

**Suppl. Table 1: Staining properties**

| Antibody               | Company | Clone | Pretreatment            | Buffer incubation time (min) | Antibody incubation time (min) | Dilution |
|------------------------|---------|-------|-------------------------|------------------------------|--------------------------------|----------|
| CD 117                 | Dako    | c-Kit | Tris/Borat/EDTA, pH 8.4 | 48                           | 24                             | 1:100    |
| CK 7                   | Ventana | SP52  | Tris/Borat/EDTA, pH 8.4 | 32                           | 24                             | RTU      |
| Kaliumhexacyanoferrate | Merck   |       |                         |                              |                                |          |
| Iron(III)-chloride     | Merck   |       |                         |                              |                                |          |
| Kernechtrot            | Merck   |       |                         |                              |                                |          |
